# Supplementary material for: Sequential compression devices in postoperative urologic patients: an observational trial and survey study on the influence of patient and hospital factors on compliance
Source: BMC Urol. 2013 Apr 11;13:20. doi: 10.1186/1471-2490-13-20 (PMC3635967; doi:10.1186/1471-2490-13-20)
Supplement: Additional file 1 — Study exit survey. [file 1471-2490-13-20-S1.pdf]

Age: \_\_\_\_\_ Gender: \_\_\_\_\_

**Your highest education level/degree: (check)**

☐ Less than high school   ☐ High school/GED   ☐ Some college   ☐ College   ☐ Masters   ☐ Doctoral

**Operation you had:** \_\_\_\_\_

---

*Please mark the response(s) below that best describes your experience with the Sequential Compression Devices (SCDs) that were placed on your legs after surgery.*

**KNOWLEDGE AND UNDERSTANDING OF SCDS**

- |                                                                                      |                              |                             |
|--------------------------------------------------------------------------------------|------------------------------|-----------------------------|
| 1. I understood the <u>purpose</u> of the SCDs .....                                 | <input type="checkbox"/> Yes | <input type="checkbox"/> No |
| 2. My physician told me about the <u>purpose</u> of the SCDs .....                   | <input type="checkbox"/> Yes | <input type="checkbox"/> No |
| 3. My nurse told me about the <u>purpose</u> of the SCDs .....                       | <input type="checkbox"/> Yes | <input type="checkbox"/> No |
| 4. I would have liked more information on the <u>purpose</u> of the SCDS.....        | <input type="checkbox"/> Yes | <input type="checkbox"/> No |
| 5. The nurses and physicians told me <u>when</u> the SCDs should be on .....         | <input type="checkbox"/> Yes | <input type="checkbox"/> No |
| 6. My nurse instructed me on <u>how to use</u> the SCDs .....                        | <input type="checkbox"/> Yes | <input type="checkbox"/> No |
| 7. I would have liked to receive more instruction on <u>how to use</u> the SCDs..... | <input type="checkbox"/> Yes | <input type="checkbox"/> No |

8. Based on the instruction and attention I received regarding the SCDs, I feel that the SCDs:

*Choose one answer.*

- a) ☐ Were not important to wear during my hospital stay
- b) ☐ Were somewhat important but not a priority
- c) ☐ Were important only during the first day.
- d) ☐ Were important only when I was in bed.
- e) ☐ Were important to be worn at all times unless I was walking.

9. To my understanding, the purpose of SCDs is to:

*Choose one answer.*

- a) ☐ Prevent muscle cramps
- b) ☐ Prevent blood clots
- c) ☐ Assist with relaxation/massage
- d) ☐ Prevent bed sores

**APPLICATION OF SCDS**

10. The SCDs were available immediately following surgery..... ☐ Yes   ☐ No   ☐ Not sure
11. The SCDs were available throughout my hospital stay..... ☐ Yes   ☐ No   ☐ Not sure
12. The nurses checked that the SCDs were on and working.... ☐ Always   ☐ Usually   ☐ Rarely   ☐ Never
13. The nurses replaced the SCDs if they were not on..... ☐ Always   ☐ Usually   ☐ Rarely   ☐ Never

14. As best as I can remember, the amount of time that I wore the SCDs during my hospitalization was:

- a) ☐ Less than half of the time I was in bed
- b) ☐ At least half of the time I was in bed
- c) ☐ All of the time I was in bed

15. If I was taught how to put on and take off the SCDs by myself:

- a) ☐ I would be able to operate the SCDs.
- b) ☐ I would not be able to operate the SCDs because they are too complicated.
- c) ☐ I would not be able to operate the SCDs because I couldn't bend or reach down to my legs after my surgery.

16. The delay in replacing the SCDs after I returned to bed was generally:

- a) ☐ No delay
- b) ☐ Less than 10 minutes
- c) ☐ 10-29 minutes
- d) ☐ 30-59 minutes
- e) ☐ 60 minutes or more

## **BOTHERSOME ASPECTS OF SCD USE**

*Please circle on the scale from 1-10 how bothersome each of the items listed below were to you:*

*(1 is not bothersome and 10 is very bothersome)*

|                                                                | <div style="display: flex; justify-content: space-between; align-items: center;"> <span>Not bothersome</span> <span>←————→</span> <span>Very bothersome</span> </div> |   |   |   |   |   |   |   |   |    |
|----------------------------------------------------------------|-----------------------------------------------------------------------------------------------------------------------------------------------------------------------|---|---|---|---|---|---|---|---|----|
| 17. The SCDs were noisy .....                                  | 1                                                                                                                                                                     | 2 | 3 | 4 | 5 | 6 | 7 | 8 | 9 | 10 |
| 18. The SCDs caused pain .....                                 | 1                                                                                                                                                                     | 2 | 3 | 4 | 5 | 6 | 7 | 8 | 9 | 10 |
| 19. The SCDs were confining .....                              | 1                                                                                                                                                                     | 2 | 3 | 4 | 5 | 6 | 7 | 8 | 9 | 10 |
| 20. The SCDs caused sweating .....                             | 1                                                                                                                                                                     | 2 | 3 | 4 | 5 | 6 | 7 | 8 | 9 | 10 |
| 21. The SCDs made my legs hot.....                             | 1                                                                                                                                                                     | 2 | 3 | 4 | 5 | 6 | 7 | 8 | 9 | 10 |
| 22. The SCDs caused insomnia or waking from sleep .....        | 1                                                                                                                                                                     | 2 | 3 | 4 | 5 | 6 | 7 | 8 | 9 | 10 |
| 23. The SCDs caused tripping or falling .....                  | 1                                                                                                                                                                     | 2 | 3 | 4 | 5 | 6 | 7 | 8 | 9 | 10 |
| 24. The SCDs caused skin irritation .....                      | 1                                                                                                                                                                     | 2 | 3 | 4 | 5 | 6 | 7 | 8 | 9 | 10 |
| 25. The SCDs caused leg or foot numbness .....                 | 1                                                                                                                                                                     | 2 | 3 | 4 | 5 | 6 | 7 | 8 | 9 | 10 |
| 26. The SCDs were itchy .....                                  | 1                                                                                                                                                                     | 2 | 3 | 4 | 5 | 6 | 7 | 8 | 9 | 10 |
| 27. Putting on and taking off the SCDs was time consuming..... | 1                                                                                                                                                                     | 2 | 3 | 4 | 5 | 6 | 7 | 8 | 9 | 10 |
| 28. The SCDs felt too tight .....                              | 1                                                                                                                                                                     | 2 | 3 | 4 | 5 | 6 | 7 | 8 | 9 | 10 |

### ADDITIONAL QUESTIONS

*Please circle the most appropriate number, corresponding to the statements below:*

*(1 is strongly disagree and 5 is strongly agree)*

- Strongly disagree   ←————→   Strongly agree
29. The SCDs felt like a massage ..... 1   2   3   4   5
30. The SCDs were difficult to use ..... 1   2   3   4   5
31. The SCDs were comfortable ..... 1   2   3   4   5
32. If given the choice, I would prefer an anti-clot injection ..... 1   2   3   4   5  
under my skin 2-3 times daily instead of using the SCDs.

### What do you believe are the main reasons why SCDs are not worn all the time?

*Place an X next to any answer that applies. If your answer(s) are not on the list, fill in the "other" line.*

- |                        |                                   |
|------------------------|-----------------------------------|
| — Too hot/sweaty       | — SCDs not replaced after removal |
| — Uncomfortable        | — Difficult to use                |
| — Noisy                | — They are not important          |
| — Wakes me up          | — Prevents walking/getting up     |
| — Itching              | — Not enough instructions given   |
| — Device not available | — Other(s) _____                  |
| — Tethering/tangling   |                                   |

### What would make SCDs easier to use?

*Place an X next to any answer that applies. If your answer(s) are not on the list, fill in the "other" line.*

- |                                       |                                                         |
|---------------------------------------|---------------------------------------------------------|
| — Lighter weight/cooler material      | — Family member training to help put on                 |
| — Wireless/cordless device            | — Better availability of nurses to assist with the SCDs |
| — Better instruction about purpose    |                                                         |
| — Better instruction about how to use | — Other(s) _____                                        |
| — No need for improvement             |                                                         |

**Please provide any additional comments regarding the SCDs in the space below. Thank you for your time and consideration in completing this survey:**
